# Supplementary material for: Arg/Lys-containing IDRs are cryptic binding domains for ATP and nucleic acids that interplay to modulate LLPS
Source: PubMed Central journal article supplement (PMC9712531; doi:10.1038/s42003-022-04293-w), 2022-12-01
Supplement: 42003_2022_4293_MOESM1_ESM.pdf [file 42003_2022_4293_MOESM1_ESM.pdf]

**Arg/Lys-containing IDRs are cryptic binding domains for ATP and nucleic acids that interplay to modulate LLPS**

**Dang Mei, Tongyang Li, Shibo Zhou and Jianxing Song\***

Department of Biological Sciences, Faculty of Science; National University of Singapore; 10 Kent Ridge Crescent, Singapore 119260

**Short title:** Mechanism of nucleic-acid-driven LLPS of TDP-43 PLD

---

**\* Corresponding author; Email:** [dbssjx@nus.edu.sg](mailto:dbssjx@nus.edu.sg).

**Supplementary Figures 1-16**

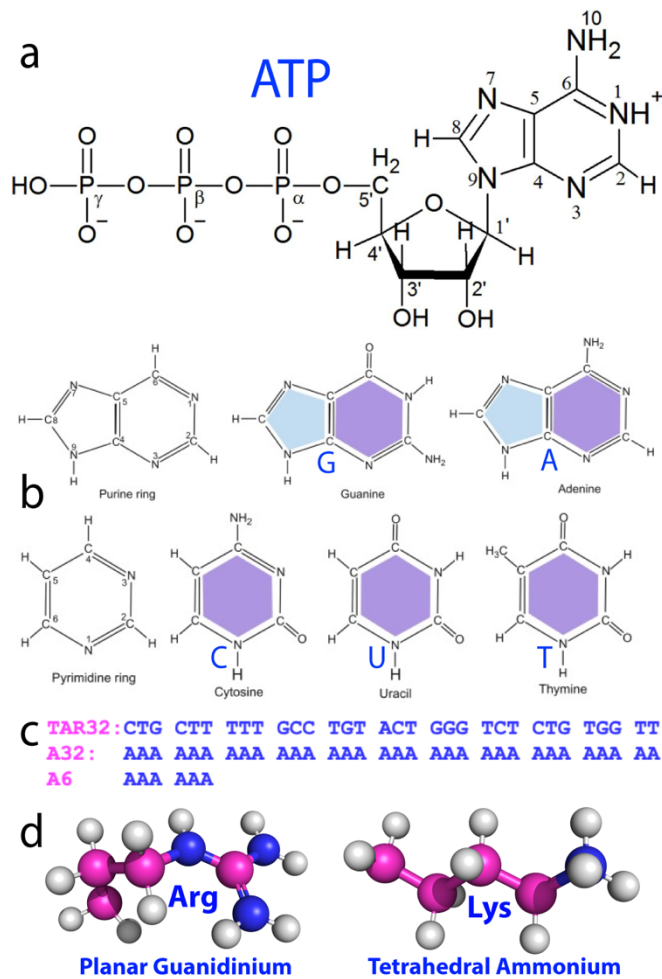

**Supplementary Figure 1. Chemical structures and sequences.**

Chemical structures of ATP (a) and nitrogenous bases in DNA and RNA (b). (c) Sequences of ssDNA Tar32, A32 and A6. (d) Stick-and-ball models of the side chains of Arg and Lys residues showing the planar guanidinium cation of arginine and tetrahedral ammonium cation of lysine.

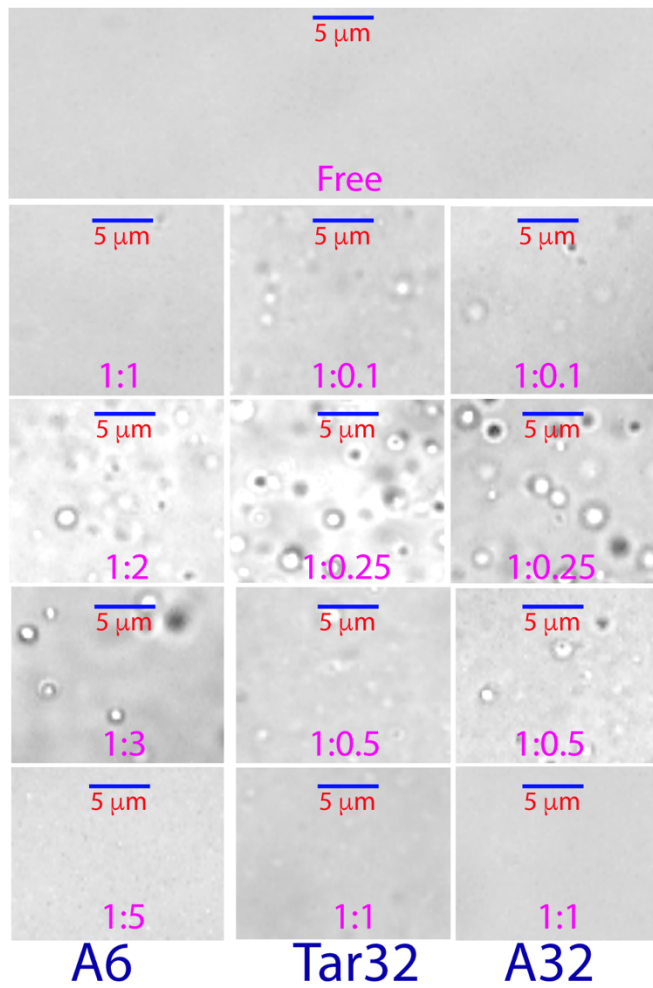

**Supplementary Figure 2. Three ssDNAs modulate LLPS of TDP-43 WT-PLD.**  
 DIC images of WT-PLD in the presence of A6, Tar32 and A32 at different molar ratios.

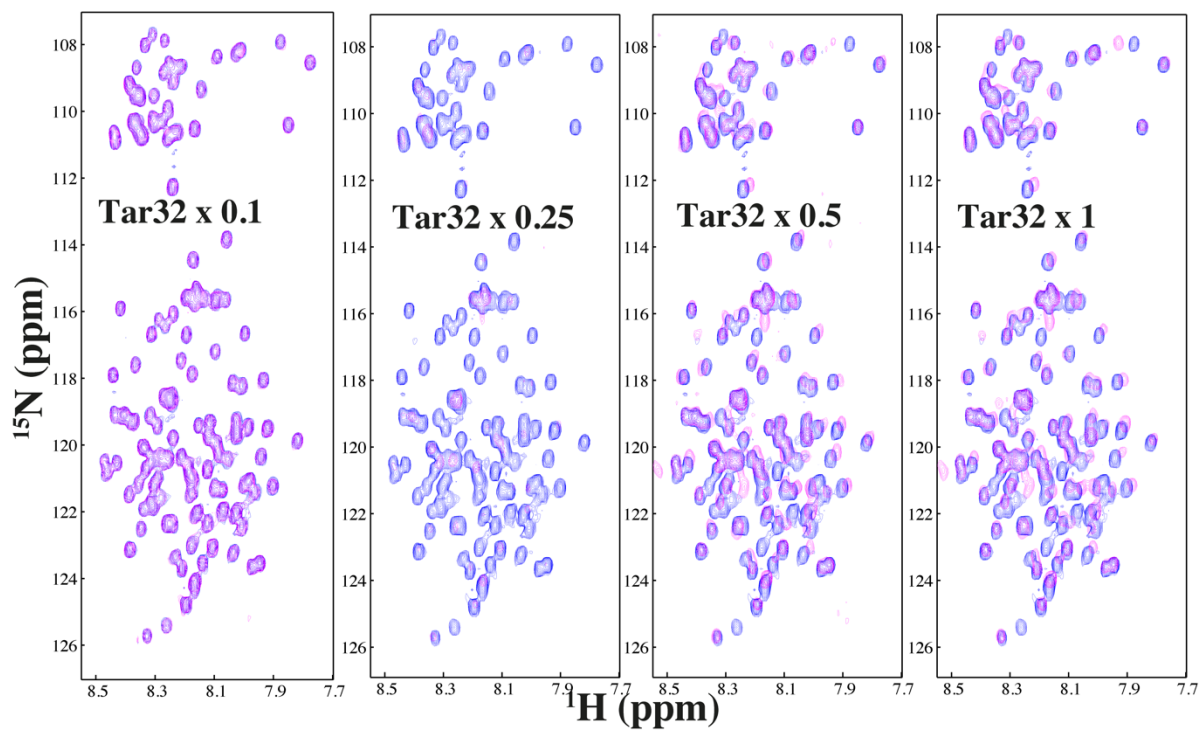

**Supplementary Figure 3. NMR characterization of the binding of WT-PLD to Tar32.**  $^1\text{H}$ - $^{15}\text{N}$  NMR HSQC spectra of  $^{15}\text{N}$ -labeled WT-PLD in the absence (blue) and in the presence of Tar32 at different molar ratios (purple).

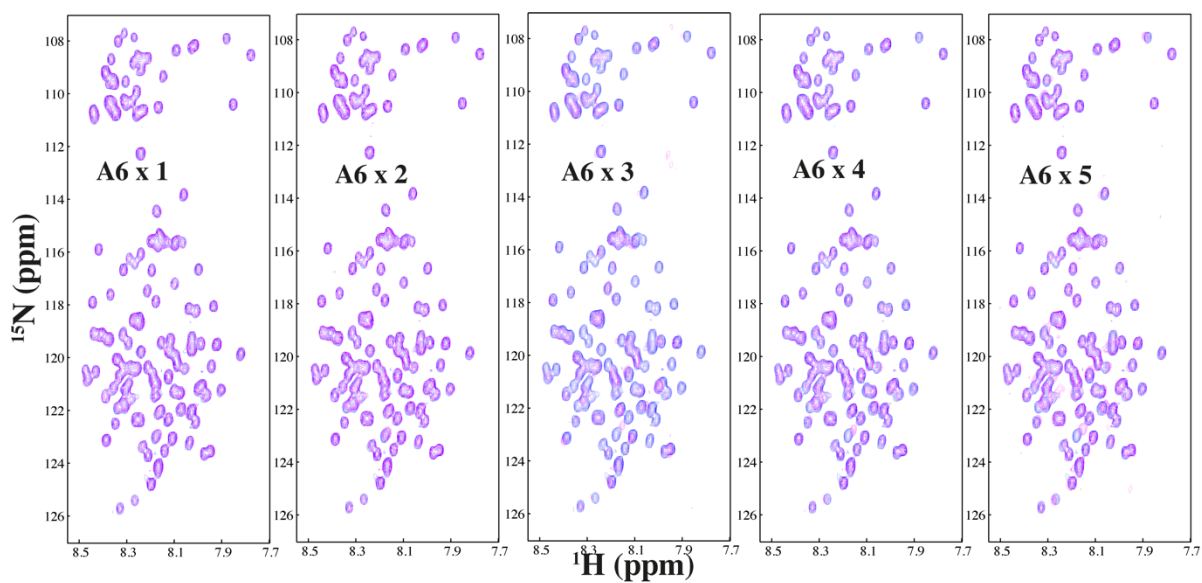

**Supplementary Figure 4. NMR characterization of the binding of WT-PLD to A6.** HSQC spectra of WT-PLD in the absence (blue) and in the presence of A6 at different molar ratios (purple).

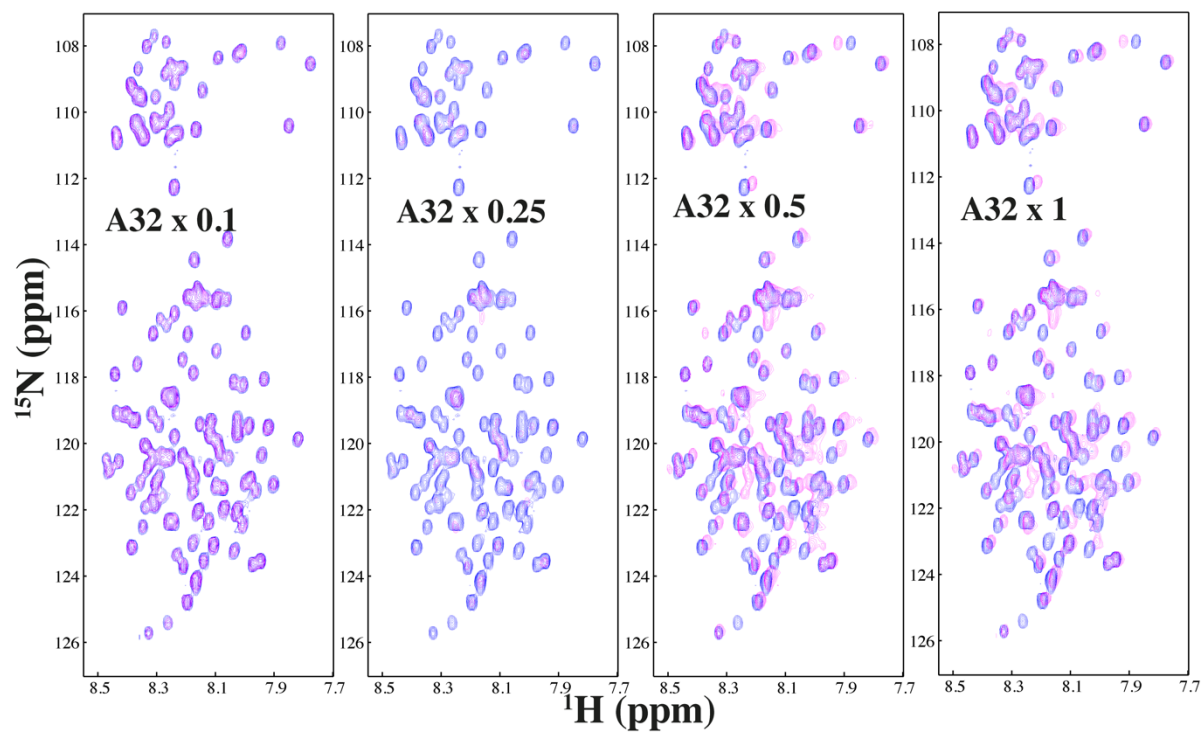

**Supplementary Figure 5. NMR characterization of the binding of WT-PLD to A32.** HSQC spectra of WT-PLD in the absence (blue) and in the presence of A32 at different molar ratios (purple).

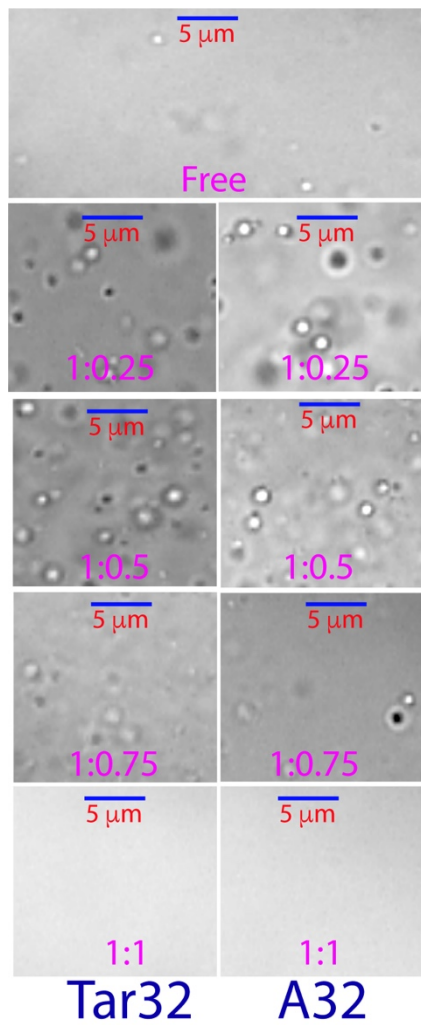

**Supplementary Figure 6. Two ssDNAs modulate LLPS of TDP-43 AIIK-PLD.**  
DIC images of AIIK-PLD in the presence of Tar32 and A32 at different molar ratios.

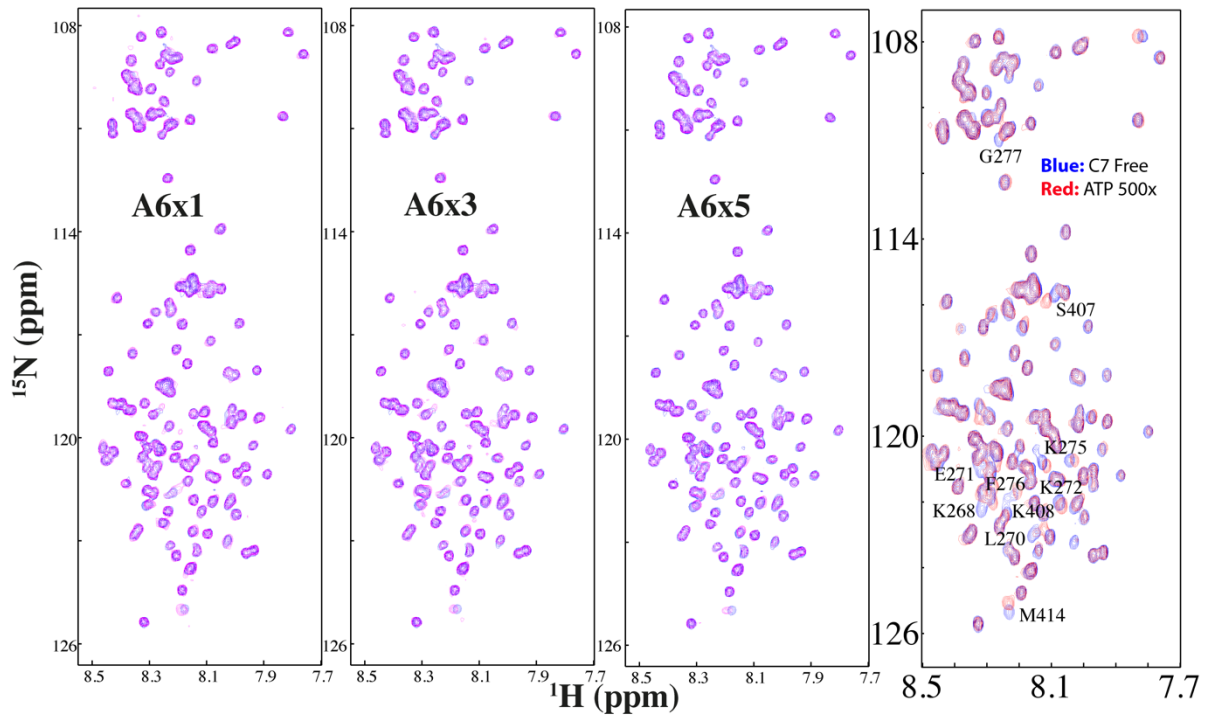

**Supplementary Figure 7. NMR characterization of the binding of AllK-PLD to A6.** HSQC spectra of AllK-PLD in the absence (blue) and in the presence of A6 at different molar ratios (purple).



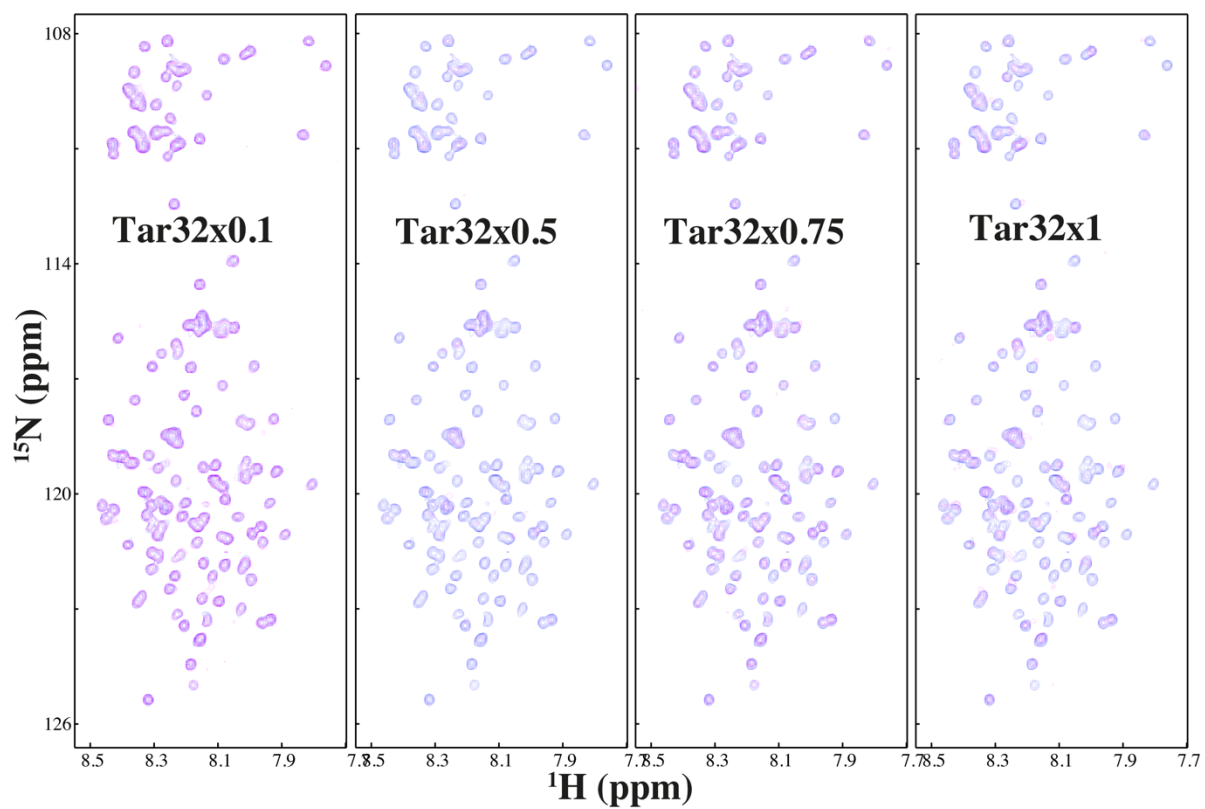

**Supplementary Figure 8. NMR characterization of the binding of AllK-PLD to Tar32.** HSQC spectra of AllK-PLD in the absence (blue) and in the presence of Tar32 at different molar ratios (purple).

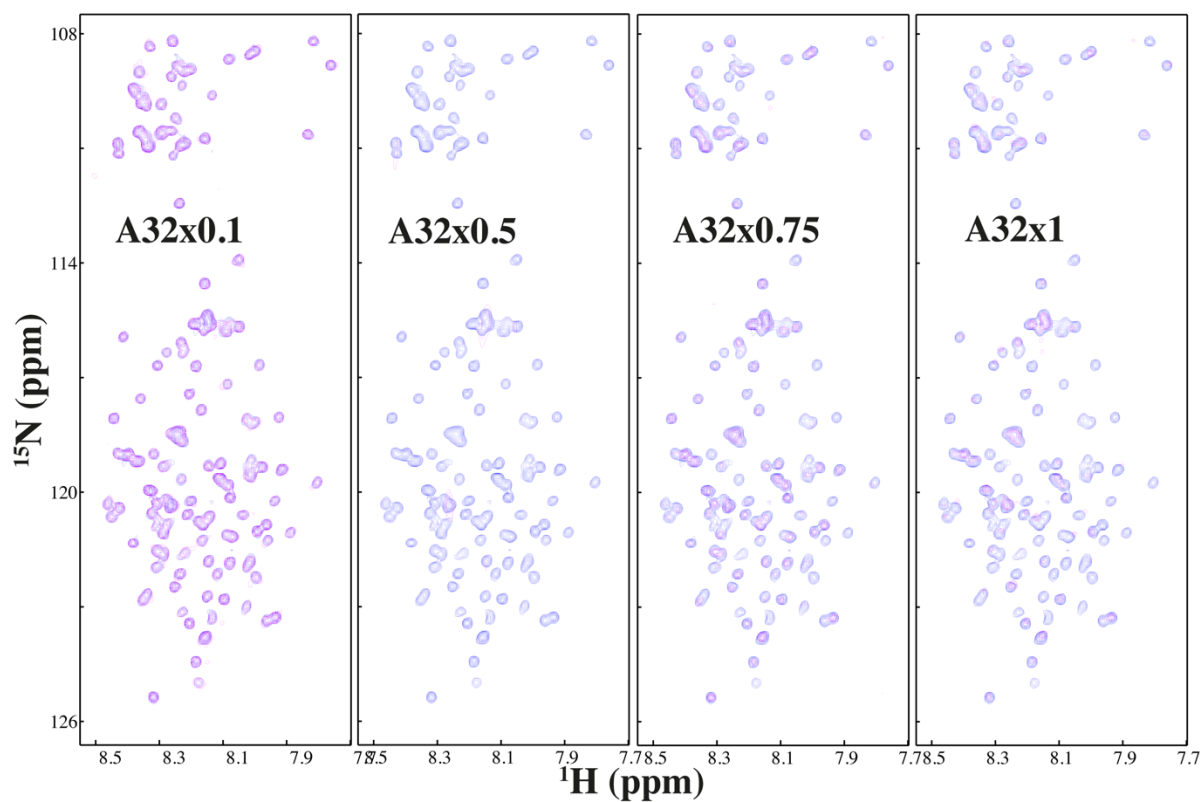

**Supplementary Figure 9. NMR characterization of the binding of AllK-PLD to A32.** HSQC spectra of AllK-PLD in the absence (blue) and in the presence of A32 at different molar ratios (purple).

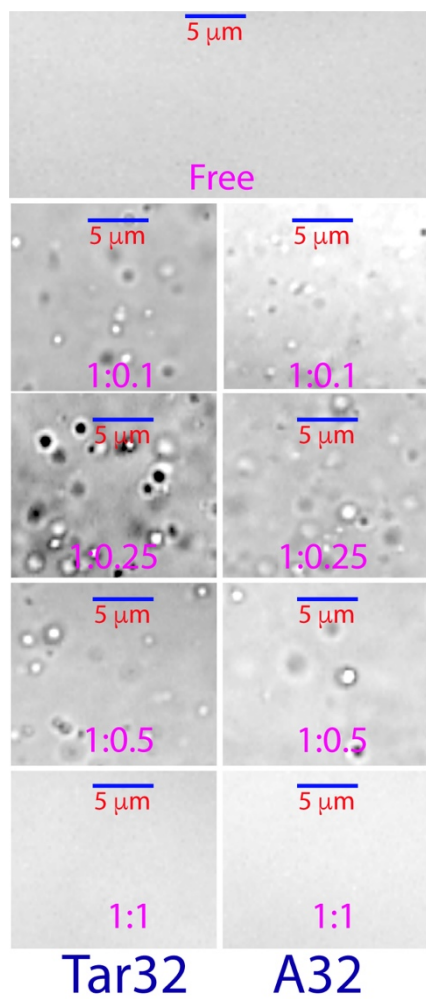

**Supplementary Figure 10. Two ssDNAs modulate LLPS of TDP-43 Del-PLD.**  
DIC images of Del-PLD in the presence of Tar32 and A32 at different molar ratios.

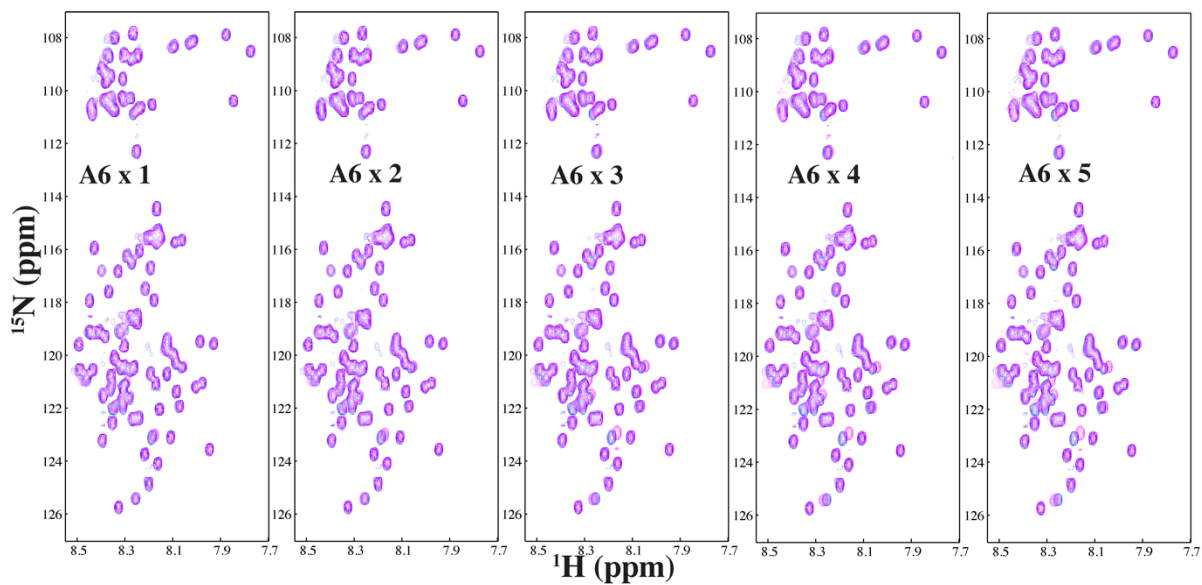

**Supplementary Figure 11. NMR characterization of the binding of Del-PLD to A6.** HSQC spectra of Del-PLD in the absence (blue) and in the presence of A6 at different molar ratios (purple).

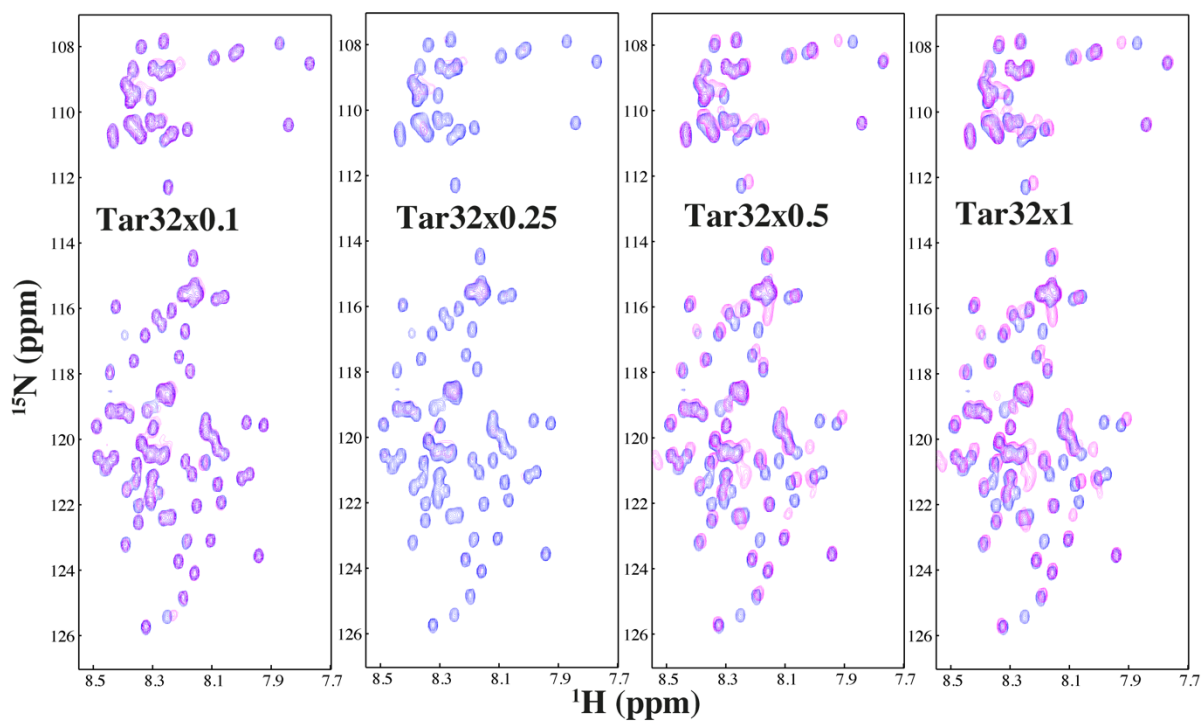

**Supplementary Figure 12. NMR characterization of the binding of Del-PLD to Tar32.** HSQC spectra of Del-PLD in the absence (blue) and in the presence of Tar32 at different molar ratios (purple).

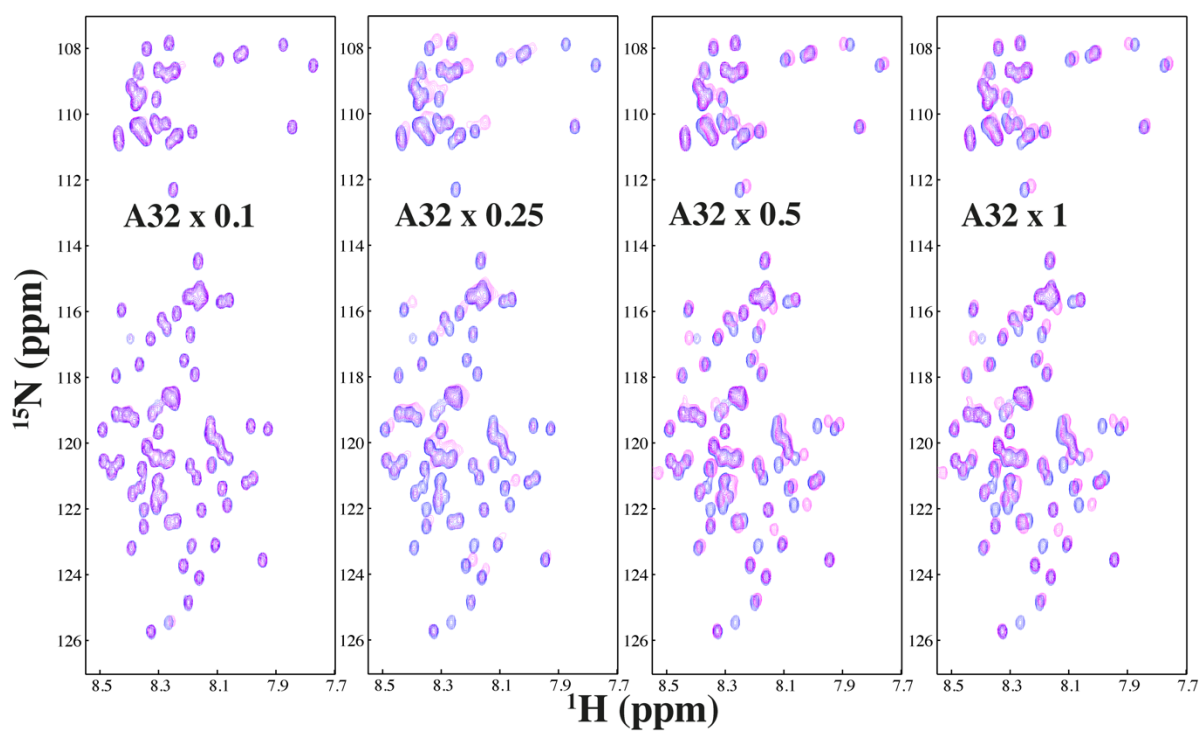

**Supplementary Figure 13. NMR characterization of the binding of Del-PLD to A32.** HSQC spectra of Del-PLD in the absence (blue) and in the presence of A32 at different molar ratios (purple).

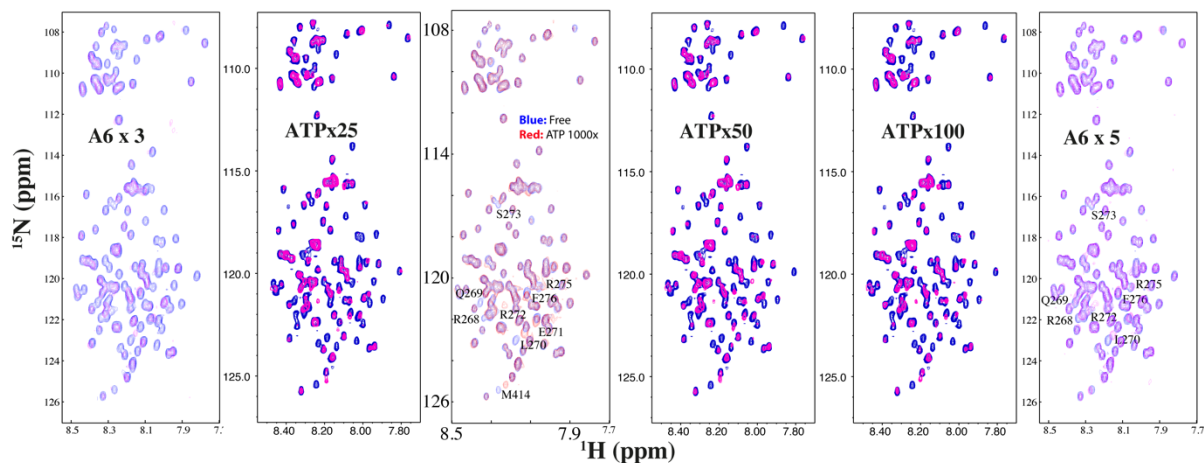

**Supplementary Figure 14. NMR characterization of ATP titrations on A6-maintained LLPS of WT-PLD.**

HSQC spectra of WT-PLD in the absence (blue) and in the presence of A6 at 1:3 (purple), and with further addition of ATP at different ratios.

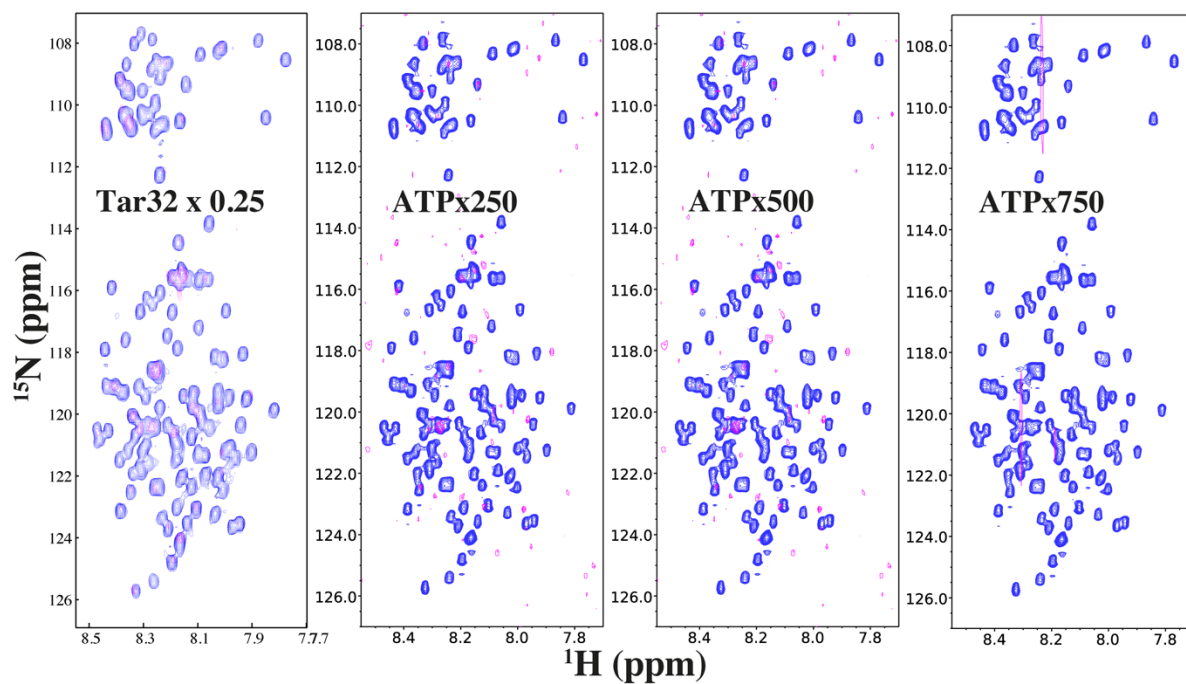

**Supplementary Figure 15. NMR characterization of ATP titrations on Tar32-maintained LLPS of WT-PLD.**

HSQC spectra of WT-PLD in the absence (blue) and in the presence of Tar32 at 1:0.25 (purple), and with further addition of ATP at different ratios.



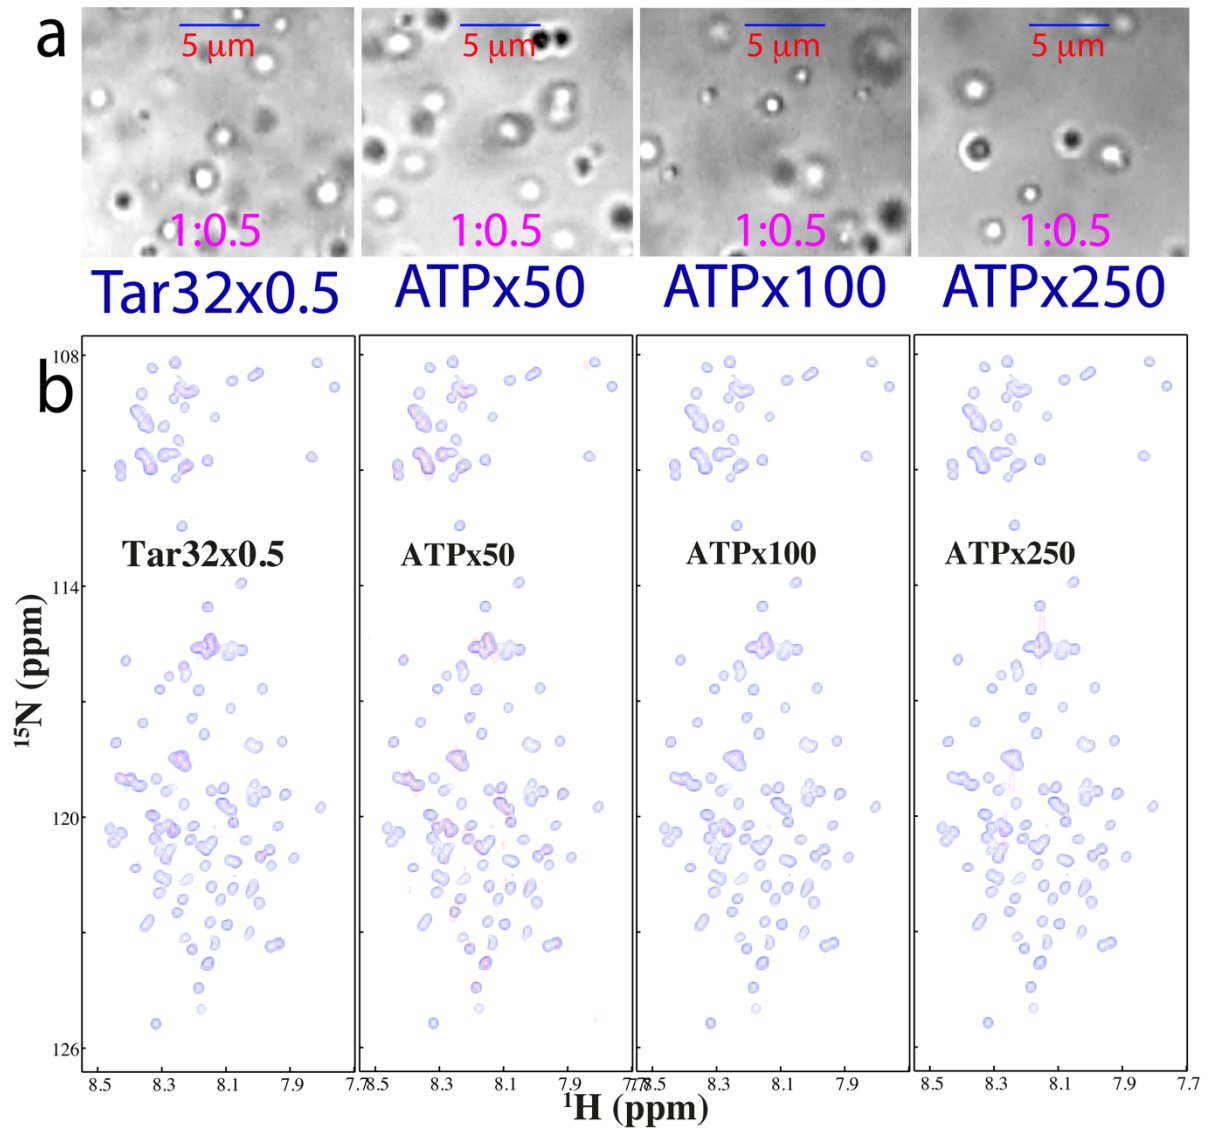

**Supplementary Figure 16. NMR characterization of ATP titrations on Tar32-maintained LLPS of AllK-PLD.**

(a) DIC images of AllK-PLD in the presence of Tar32 at 0.5 and with further titrations of ATP at different molar ratios. (b) HSQC spectra of AllK-PLD in the absence (blue) and in the presence of Tar32 at 1:0.5 (purple), and with further titrations of ATP at different ratios.
