# Supplementary material for: Arg/Lys-containing IDRs are cryptic binding domains for ATP and nucleic acids that interplay to modulate LLPS
Source: PubMed Central journal article supplement (PMC9712531; doi:10.1038/s42003-022-04293-w), 2022-12-01
Supplement: 42003_2022_4293_MOESM2_ESM.pdf [file 42003_2022_4293_MOESM2_ESM.pdf]

## **Description of Additional Supplementary Files**

**File name:** Supplementary Data 1

**Description:** an excel file which contains all turbidity and NMR data used for preparing main figures.
